# Supplementary material for: Multicomponent isocyanide-based synthesis of reactive styrenic and (meth)acrylic monomers and their RAFT (co)polymerization
Source: Royal Society of Chemistry journal article supplement (doi:10.1039/c4py01147c), 2014-09-26
Supplement: c4py01147c1.pdf [file c4py01147c1.pdf]

## Supporting Information

### Multicomponent Isocyanide-based Synthesis of Reactive Styrenic and (Meth)acrylic Monomers and their RAFT (Co)polymerization

*Sonja Schmidt, Miriam Koldevitz, Janina-Miriam Noy, Peter J. Roth\**

Centre for Advanced Macromolecular Design (CAMD), School of Chemical Engineering, University of New South  
Wales, UNSW Sydney NSW 2052, Australia

\* corresponding author, email address: [P.Roth@unsw.edu.au](mailto:P.Roth@unsw.edu.au)

# Monomer Characterization: $^1\text{H}$ , $^{13}\text{C}$ , ( $^{19}\text{F}$ ) NMR spectra

*t*Bu-A-MBu

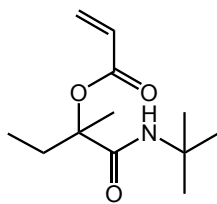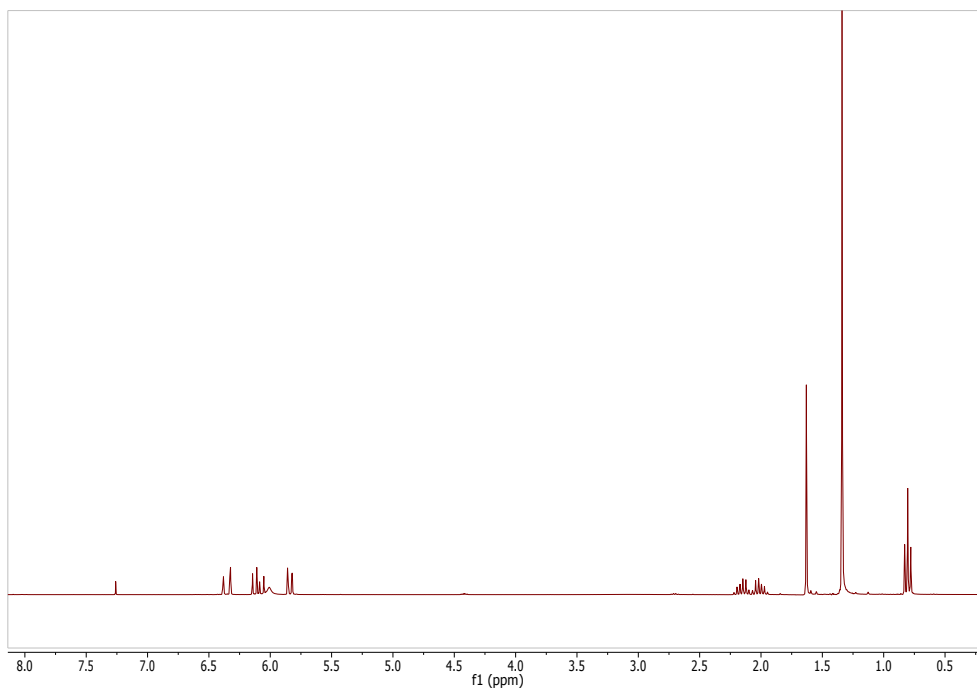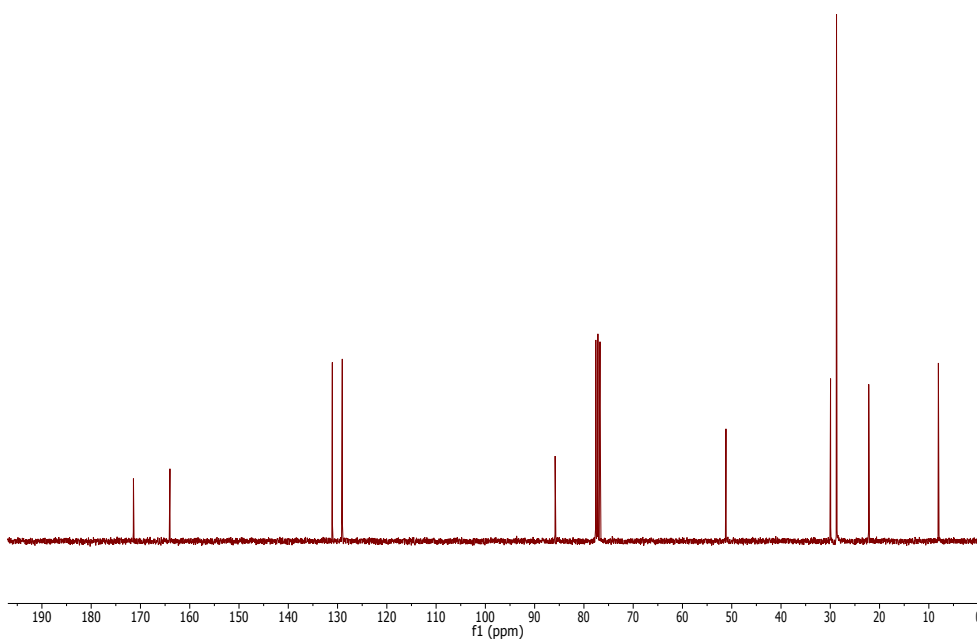

***t*Bu-MA-MBu.**

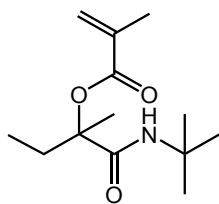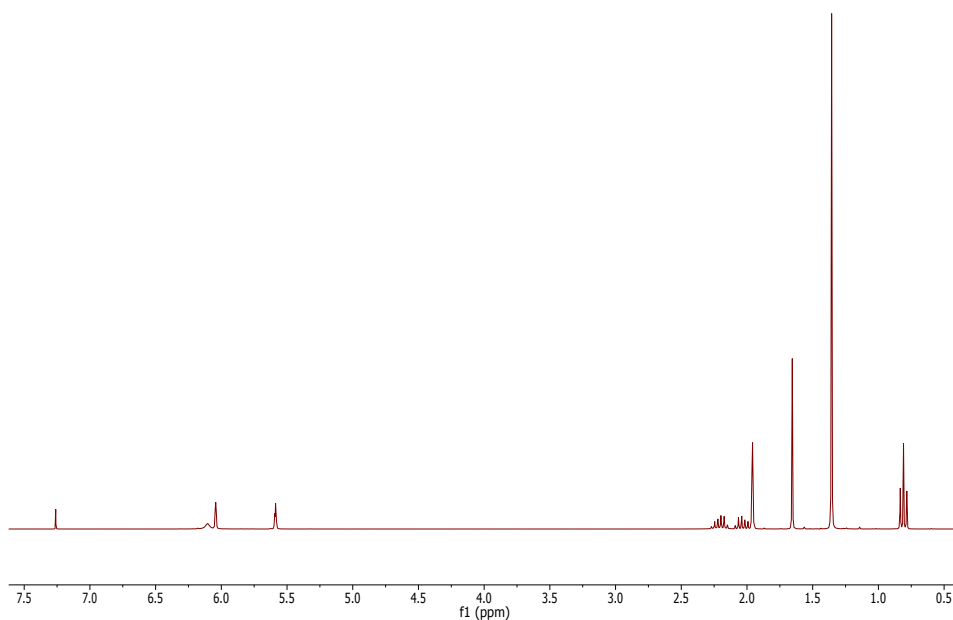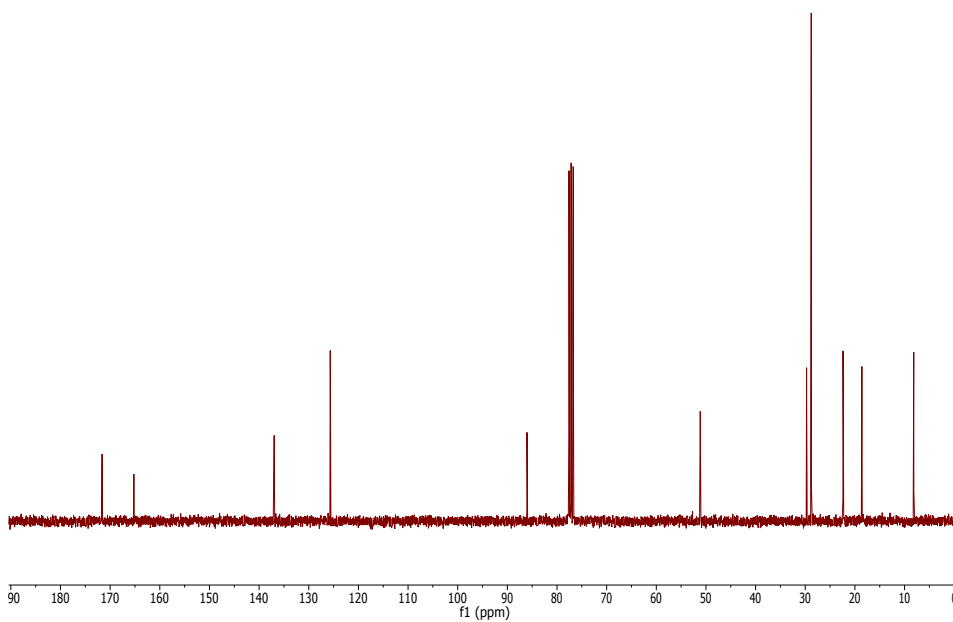

***t*Bu-A-Fur**

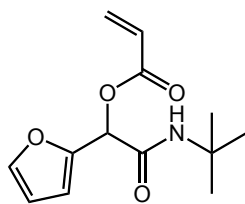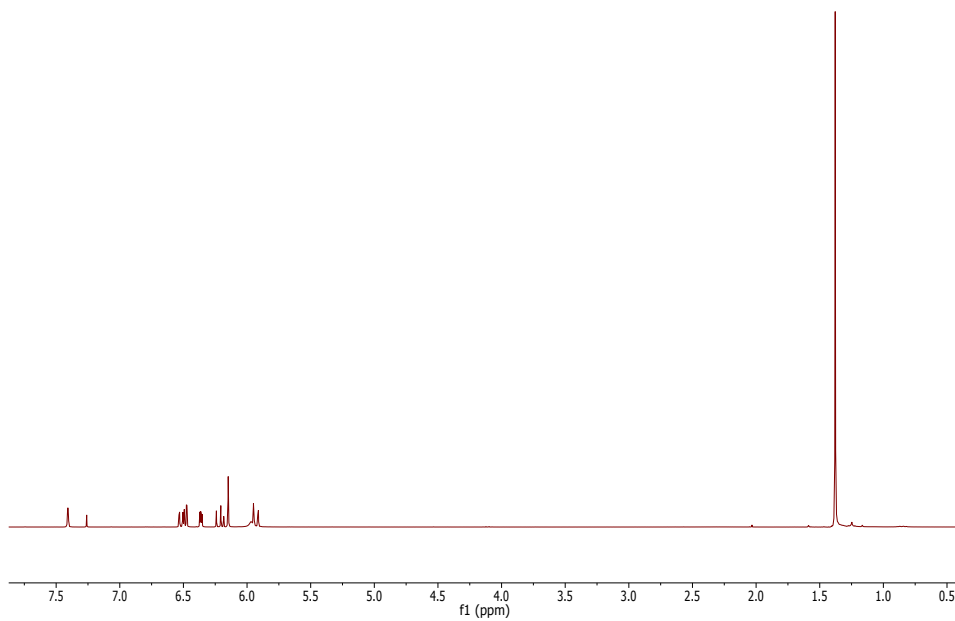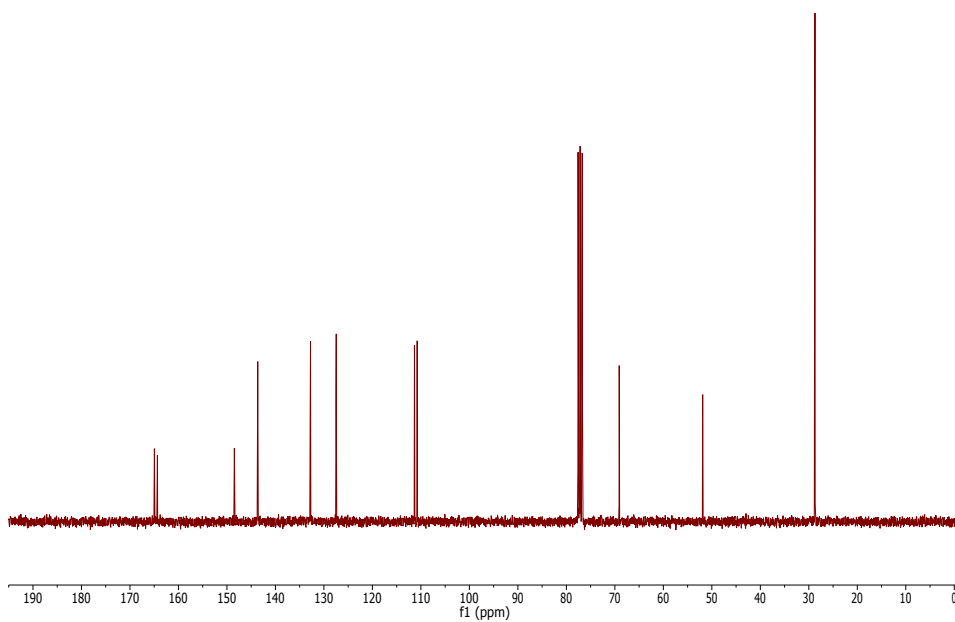

***t*Bu-MA-Fur.**

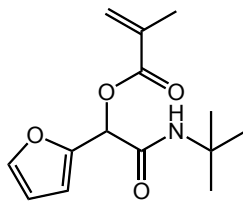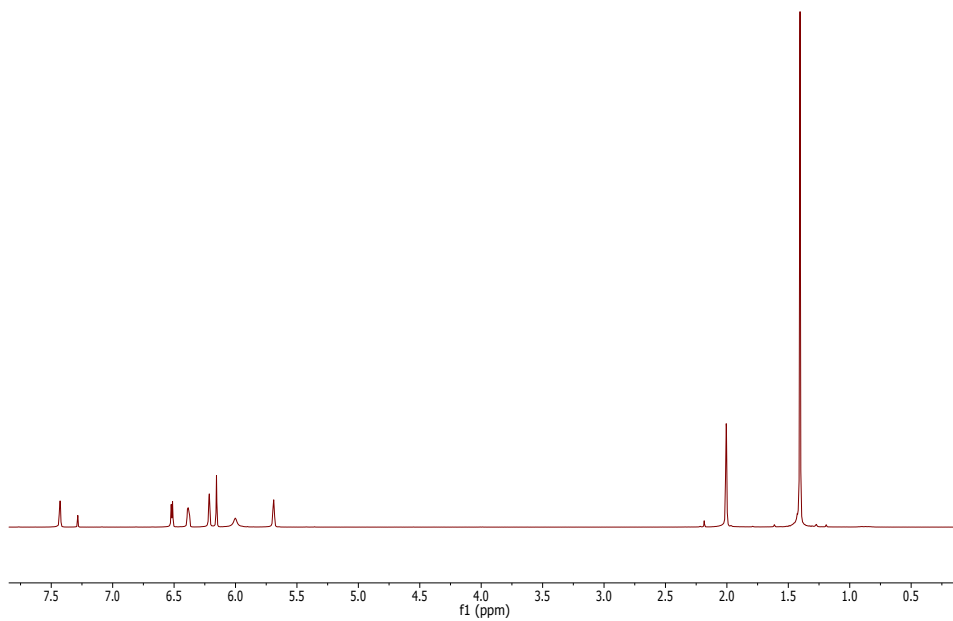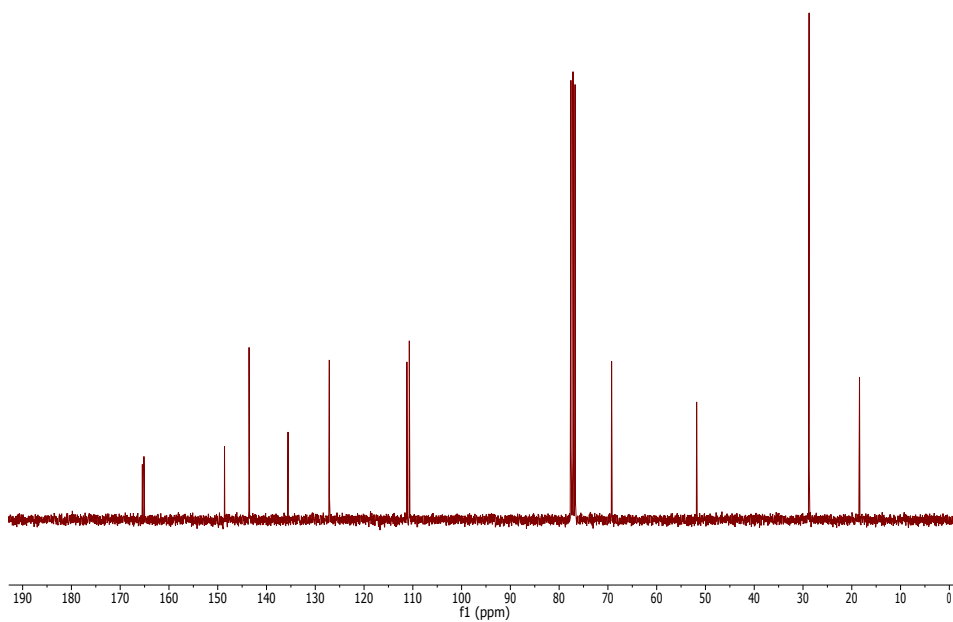

**cHex-A-Fur.**

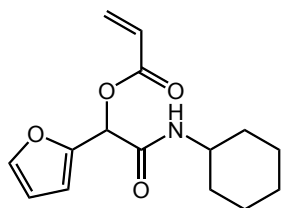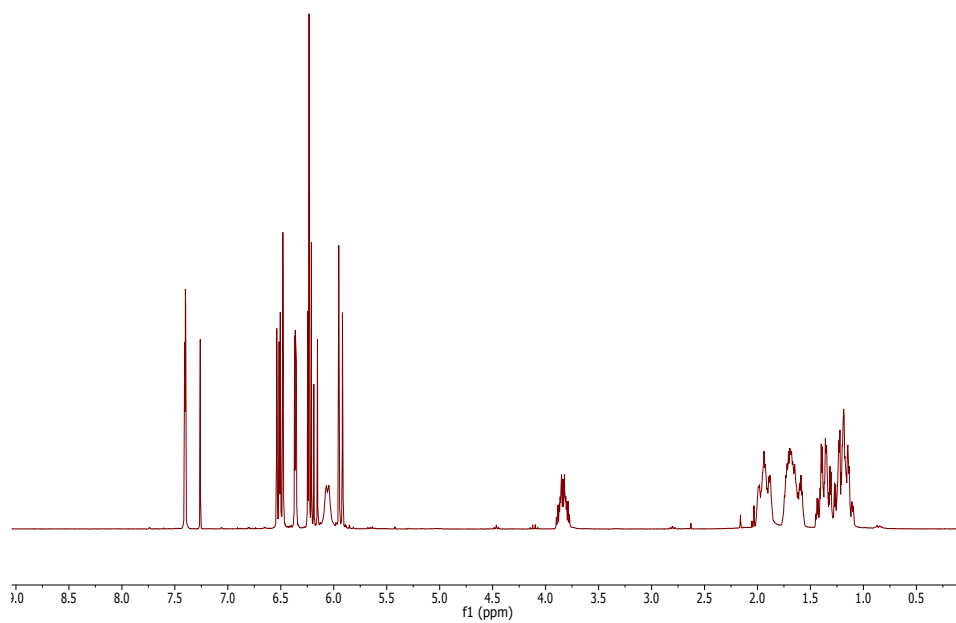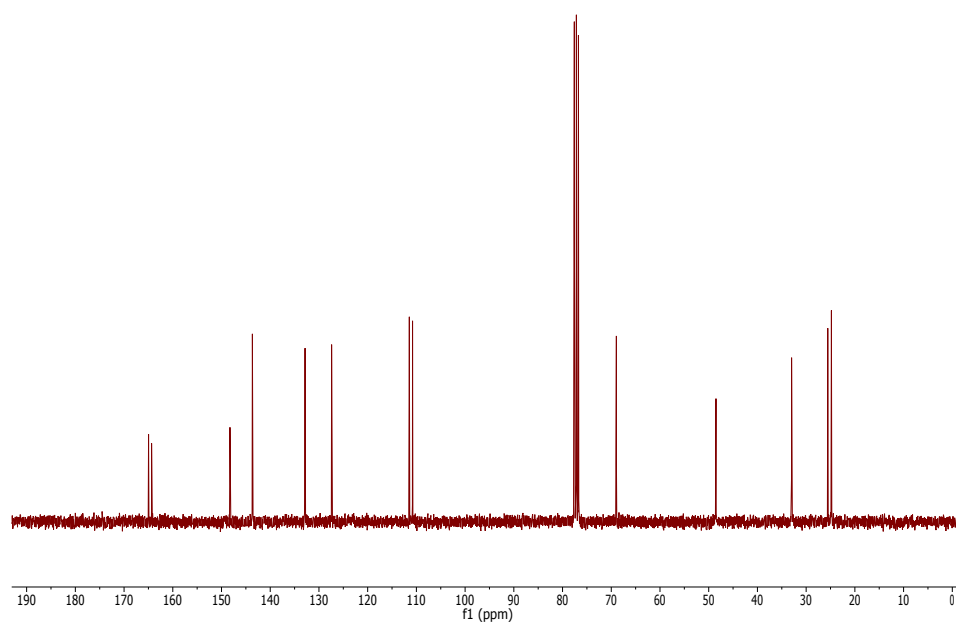

***t*Bu-A-Pentene.**

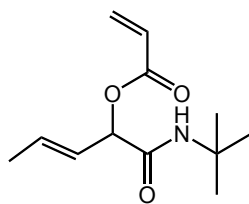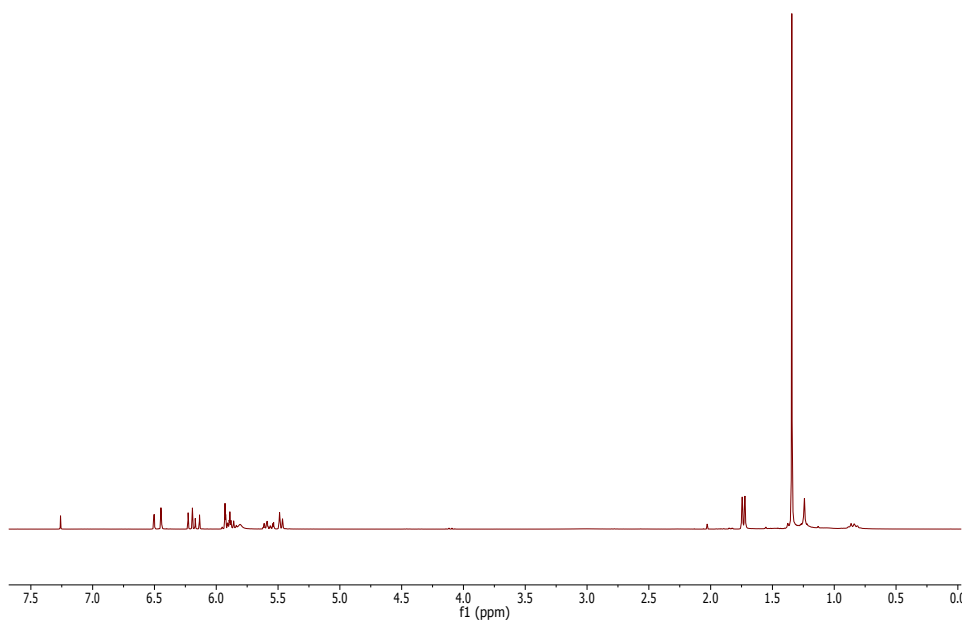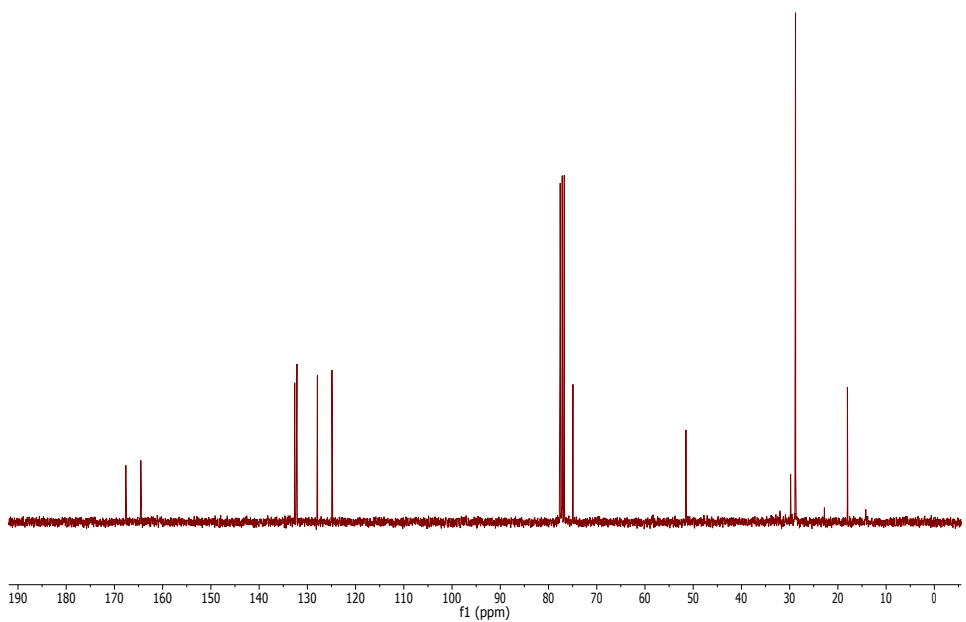

***t*Bu-MA-Pentene.**

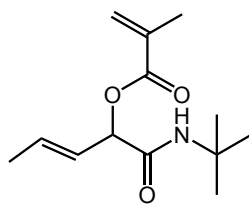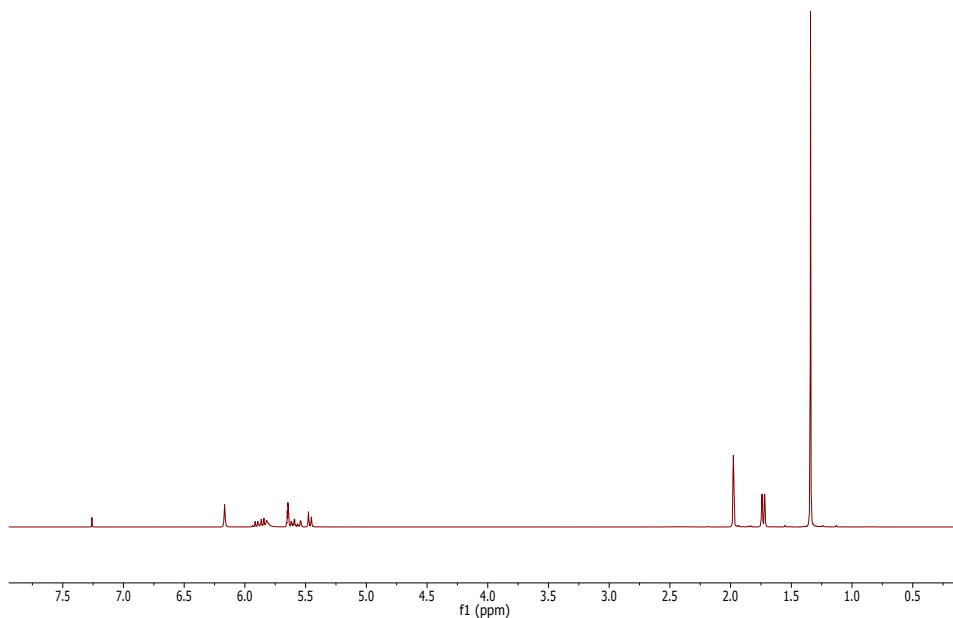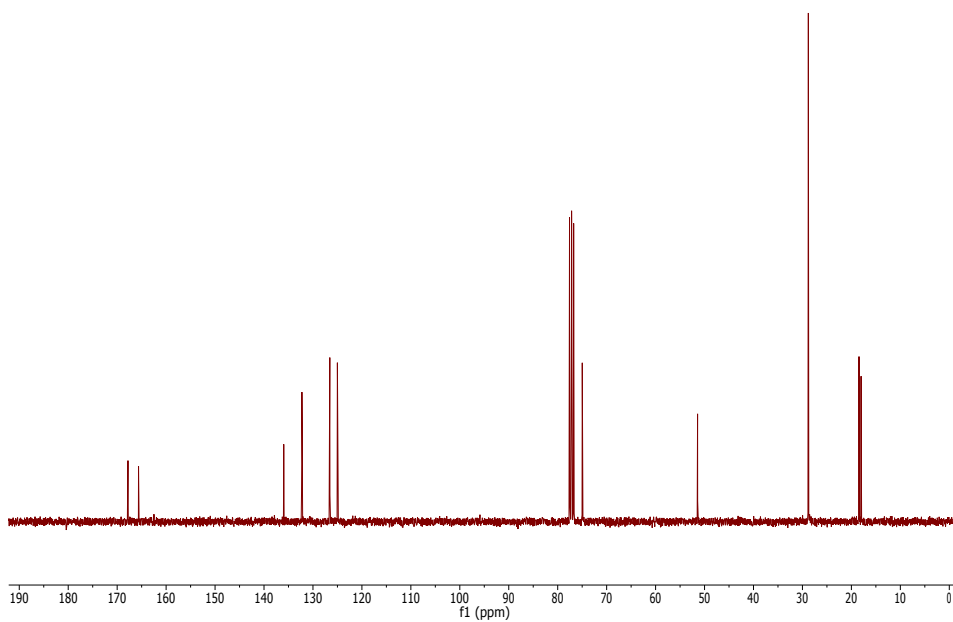



**cHex-A-Pentene.**

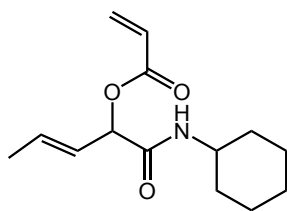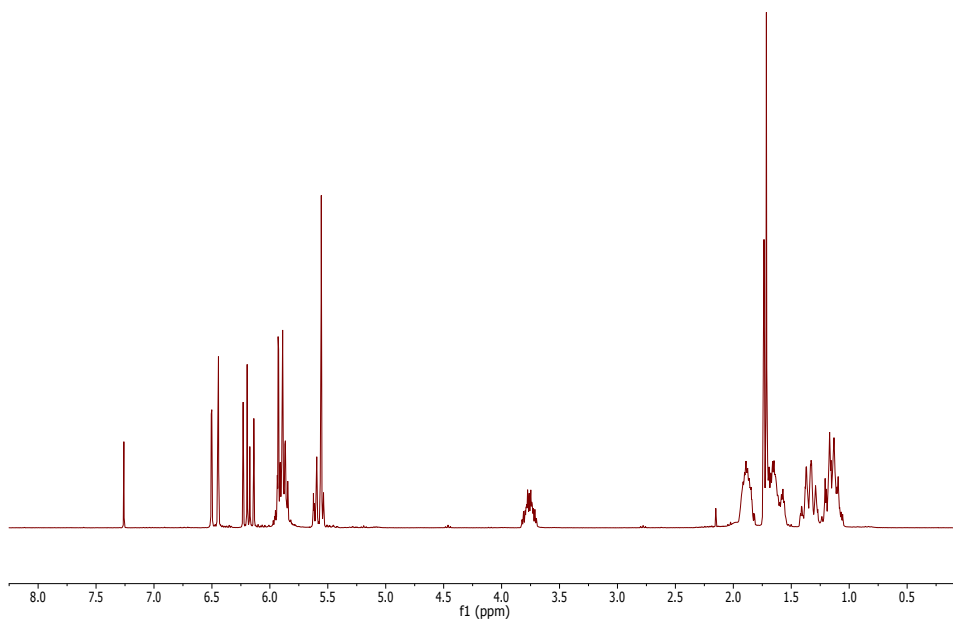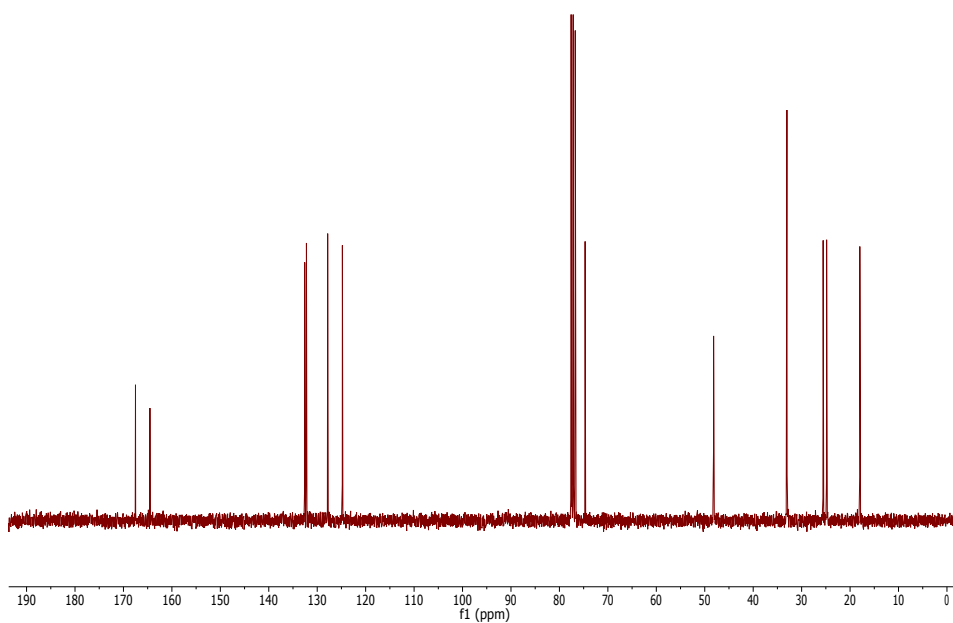

***t*Bu-A-TMSyne.**

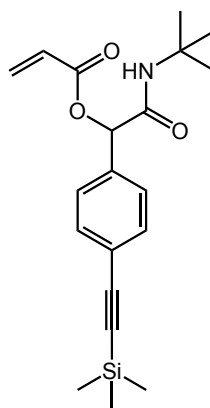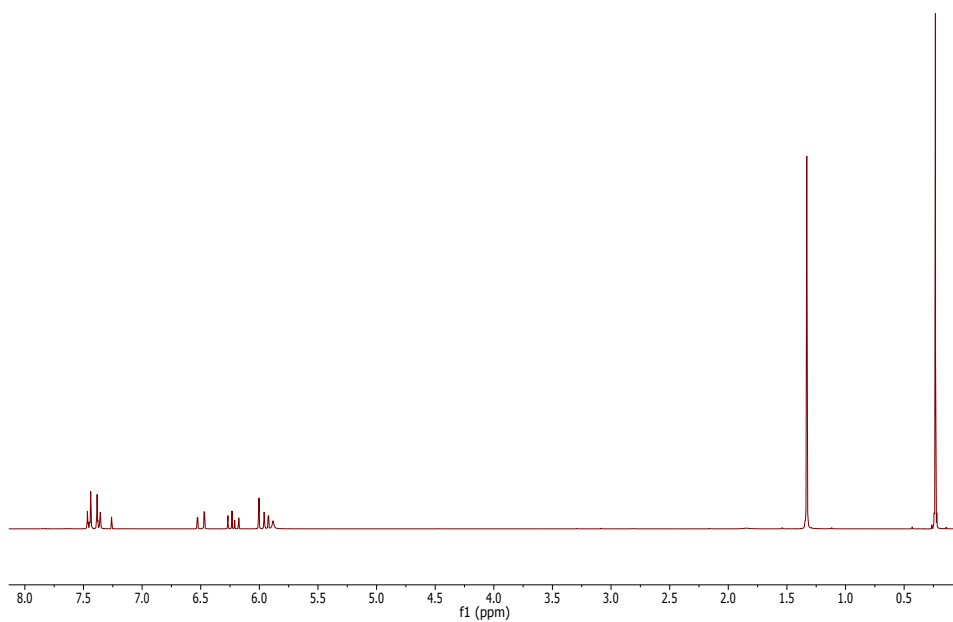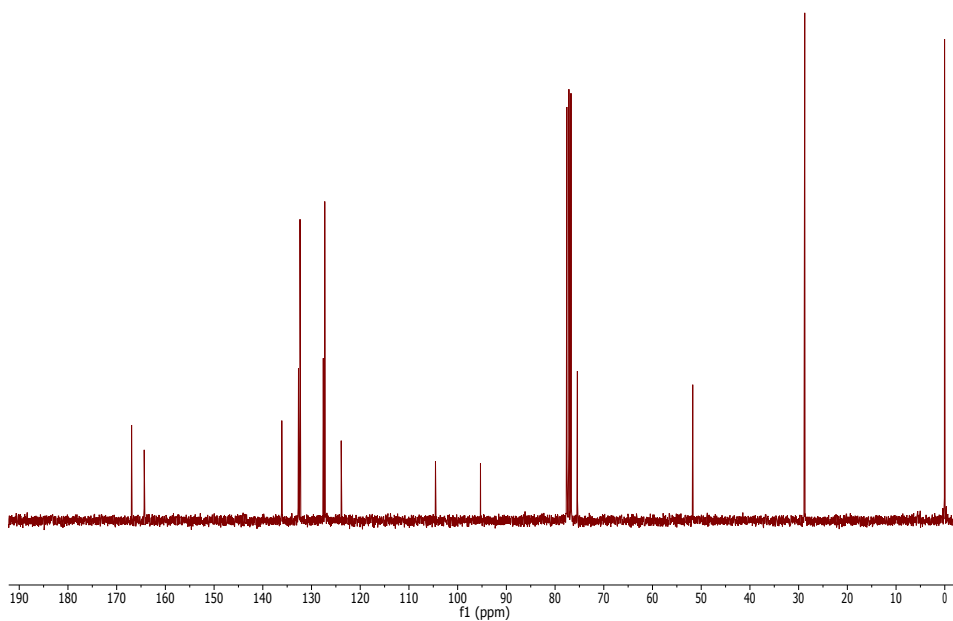

***t*Bu-MA-TMSyne.**

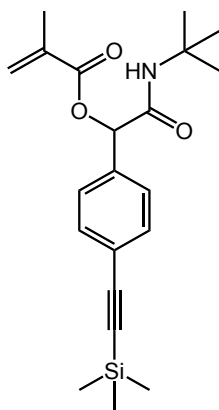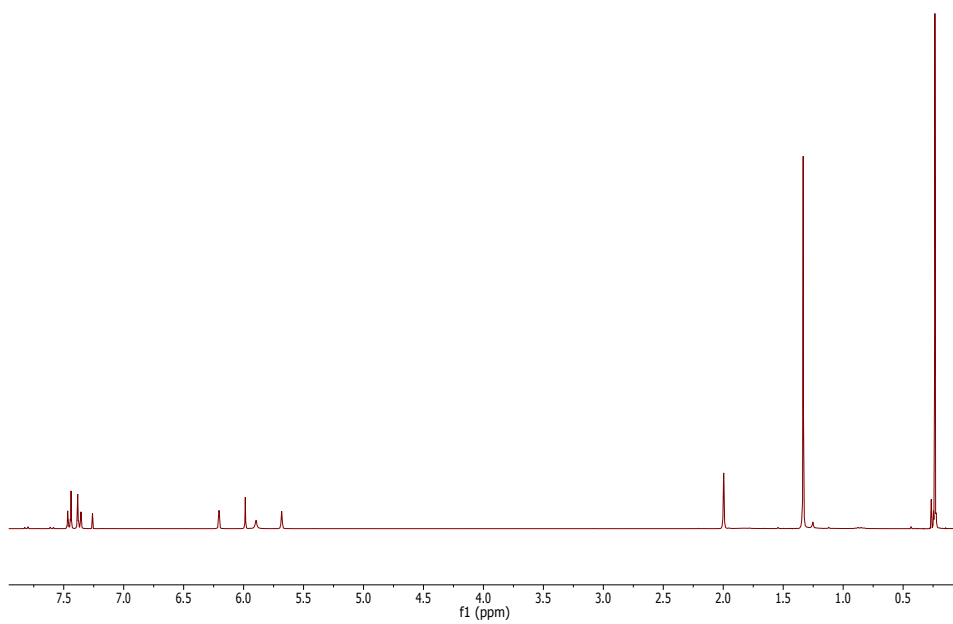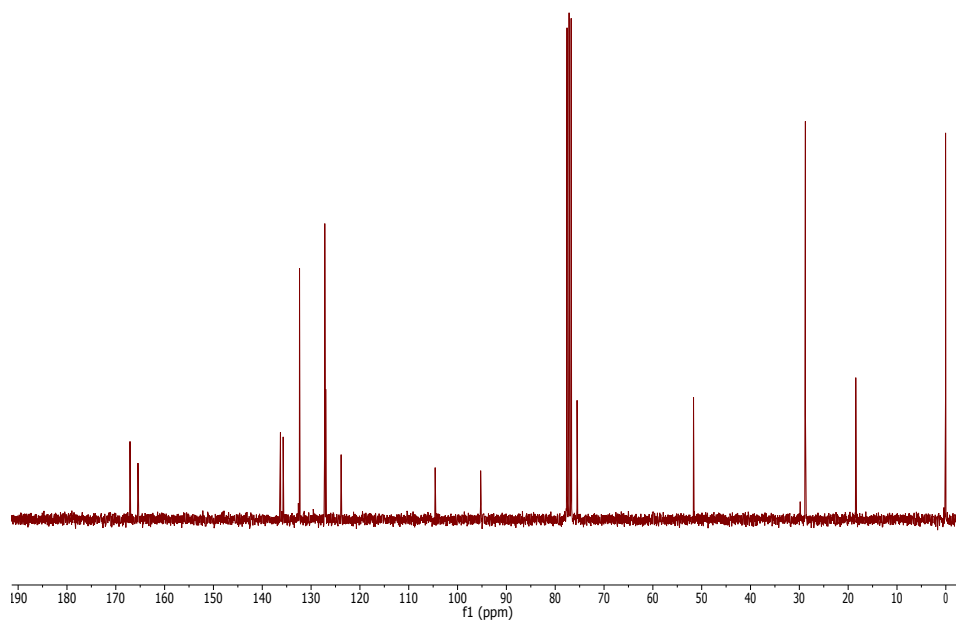

***t*Bu-A-PFP.**

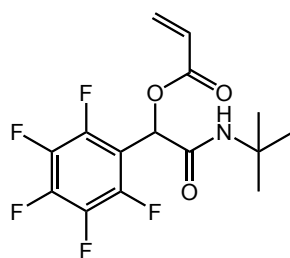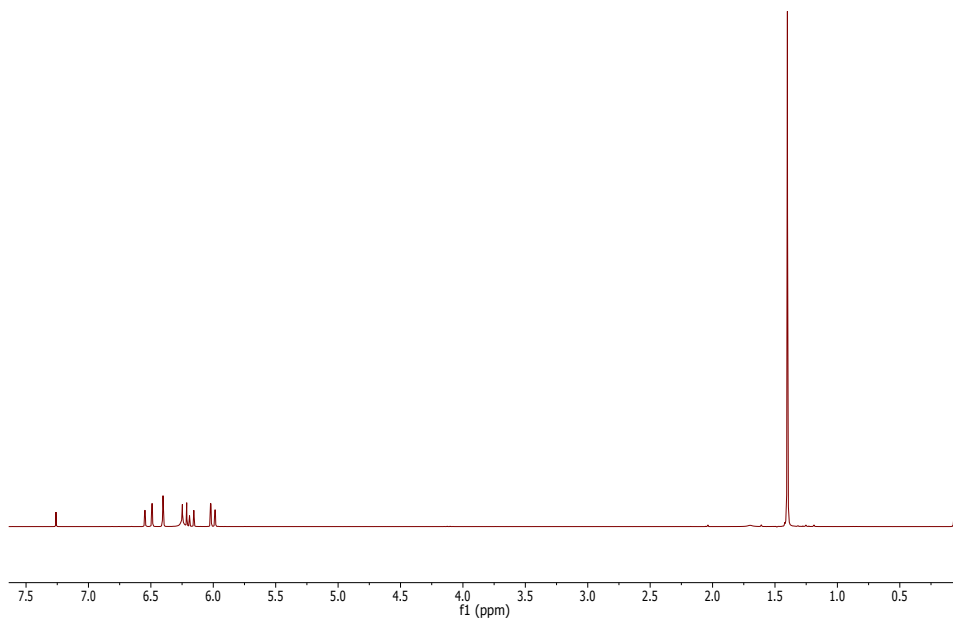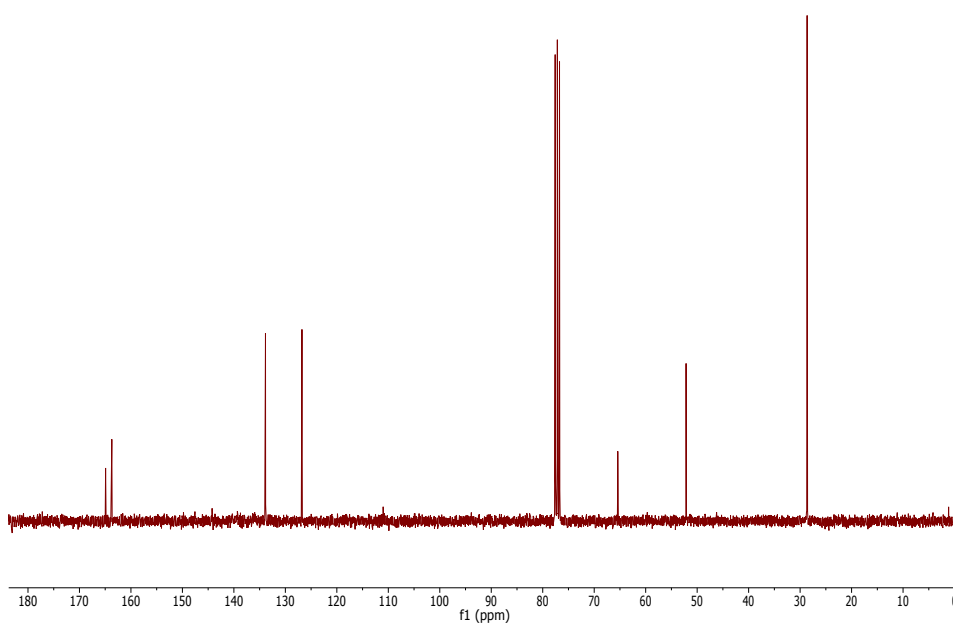

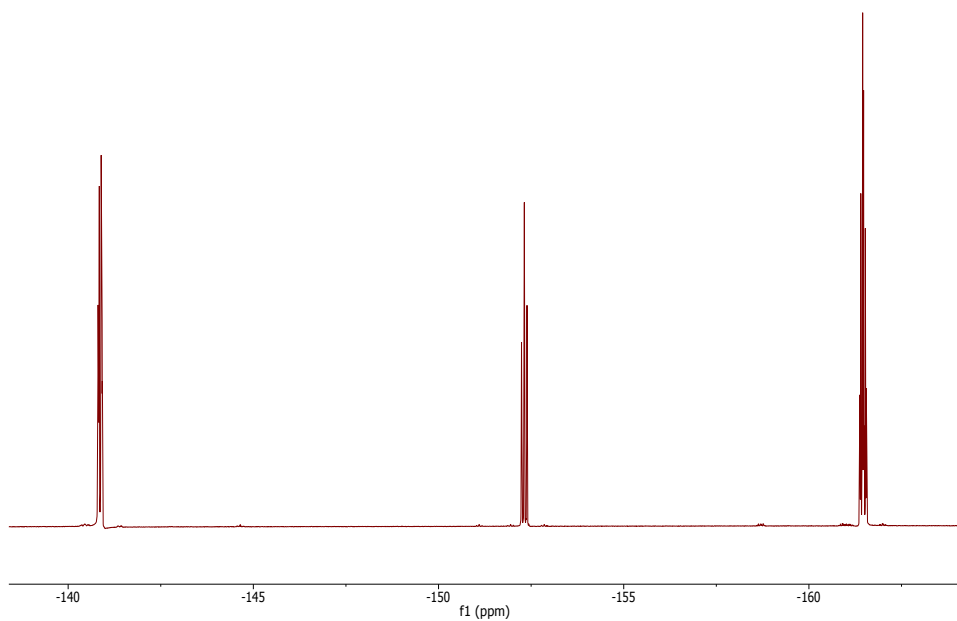

**tBu-A-PFP**  $^{19}\text{F}$  NMR

**tBu-MA-PFP.**

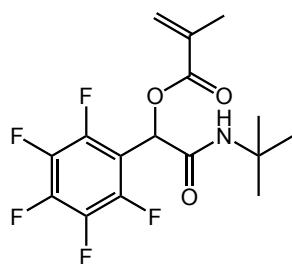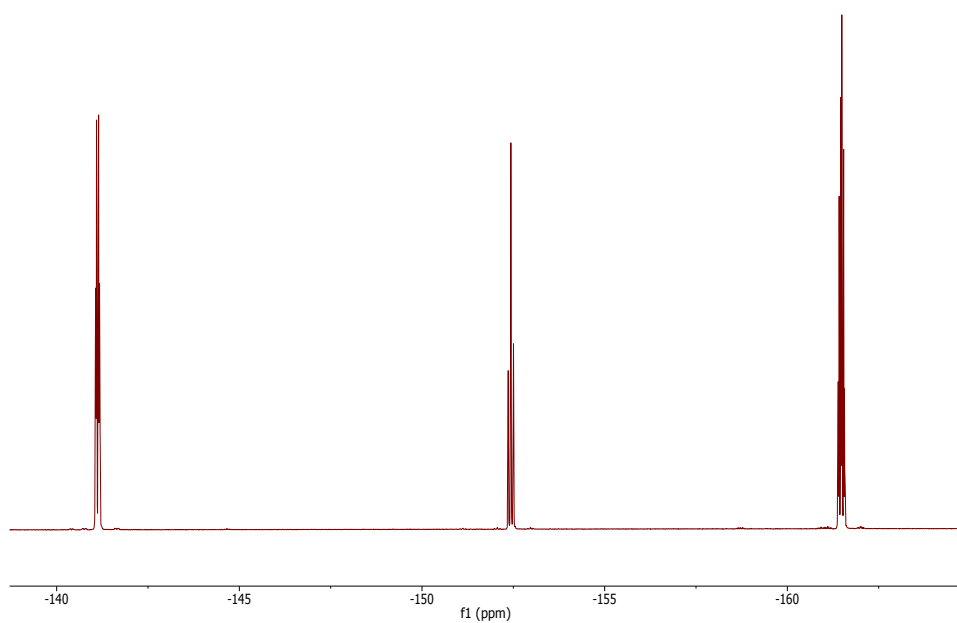

**tBu-MA-PFP**  $^{19}\text{F}$  NMR

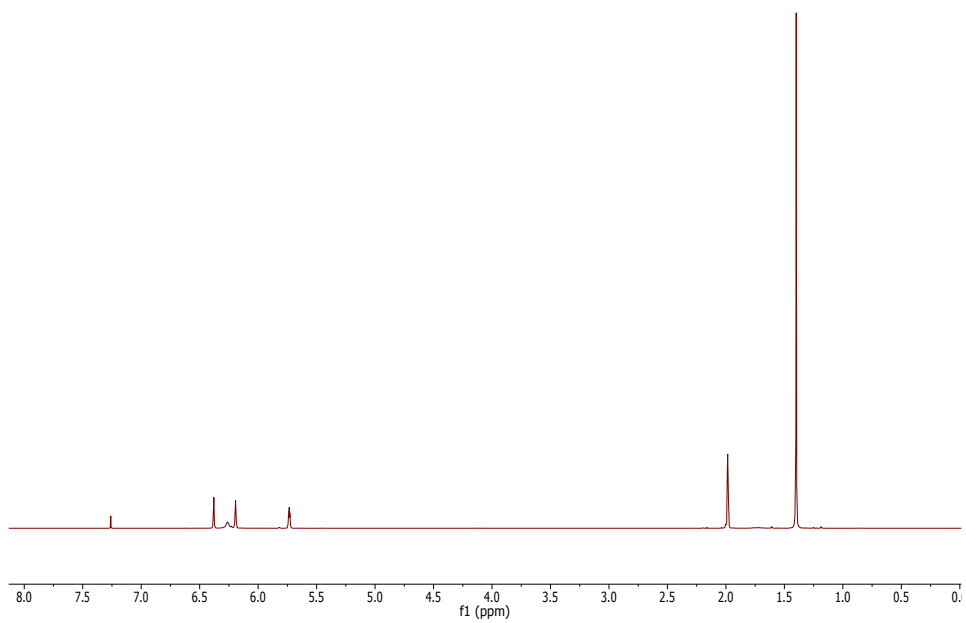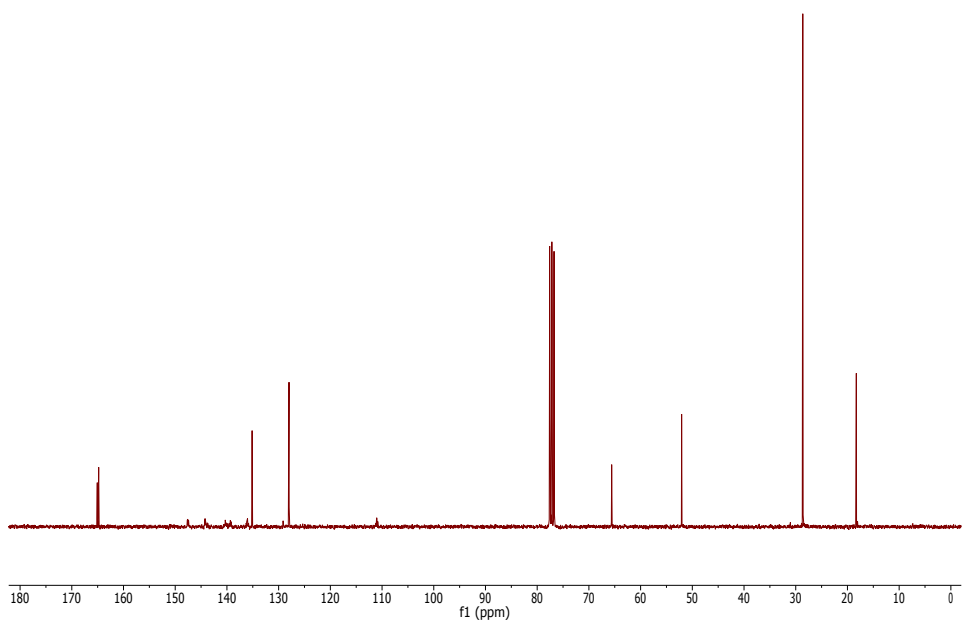

***t*Bu-MA-PFP  $^1\text{H}$ ,  $^{13}\text{C}$  NMR**

**cHex-A-PFP.**

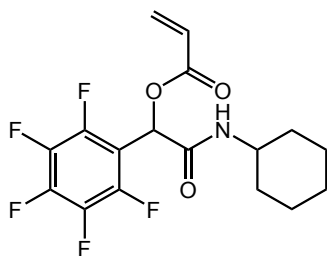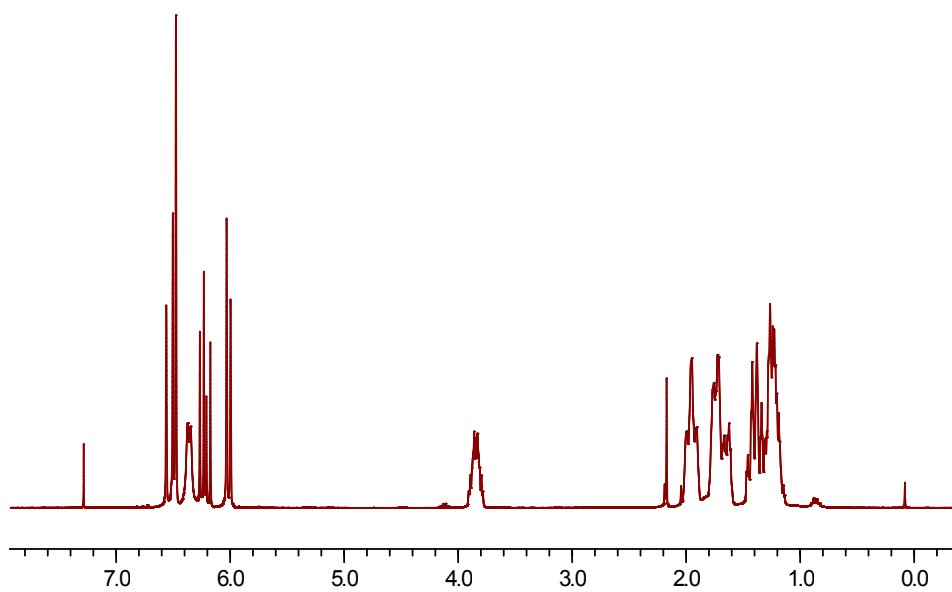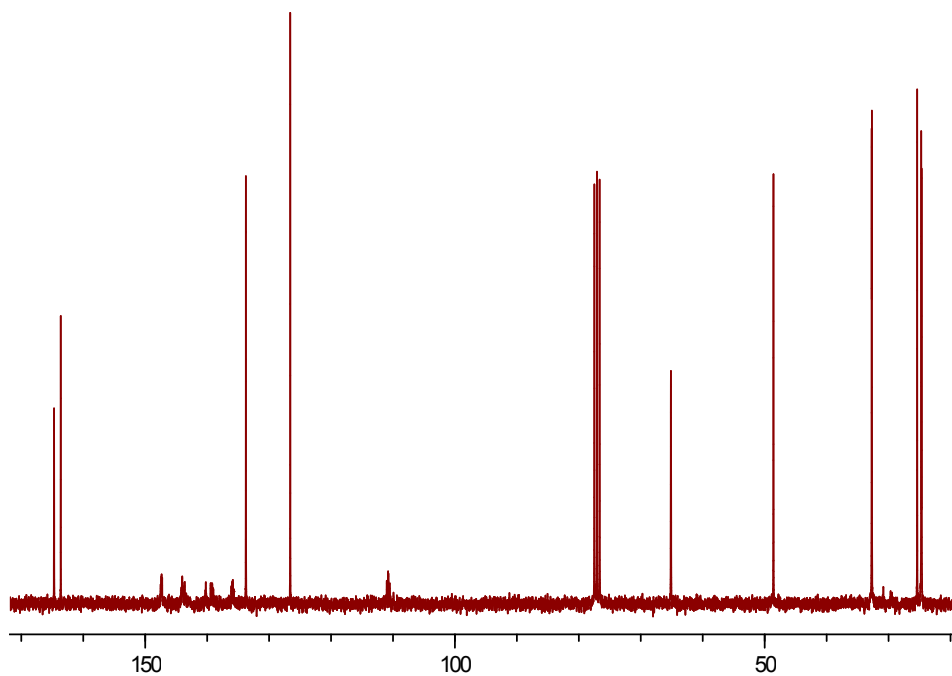

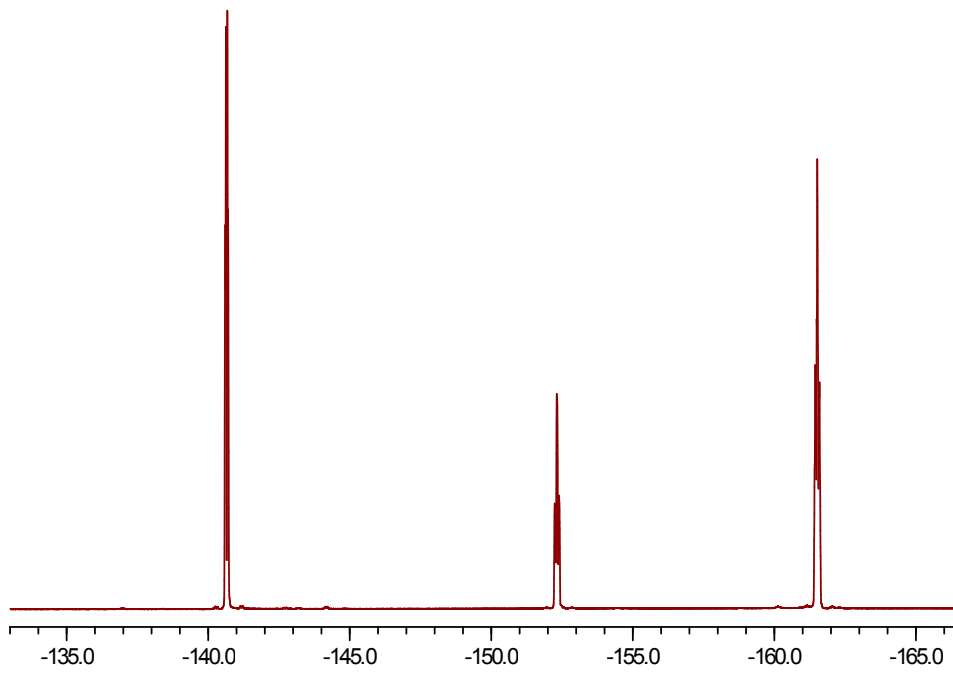

**cHex-A-PFP**  $^{19}\text{F}$  NMR



***t*Bu-Ac-Sty.**

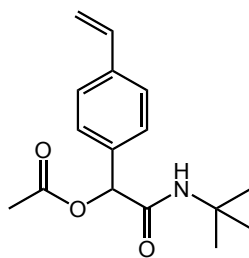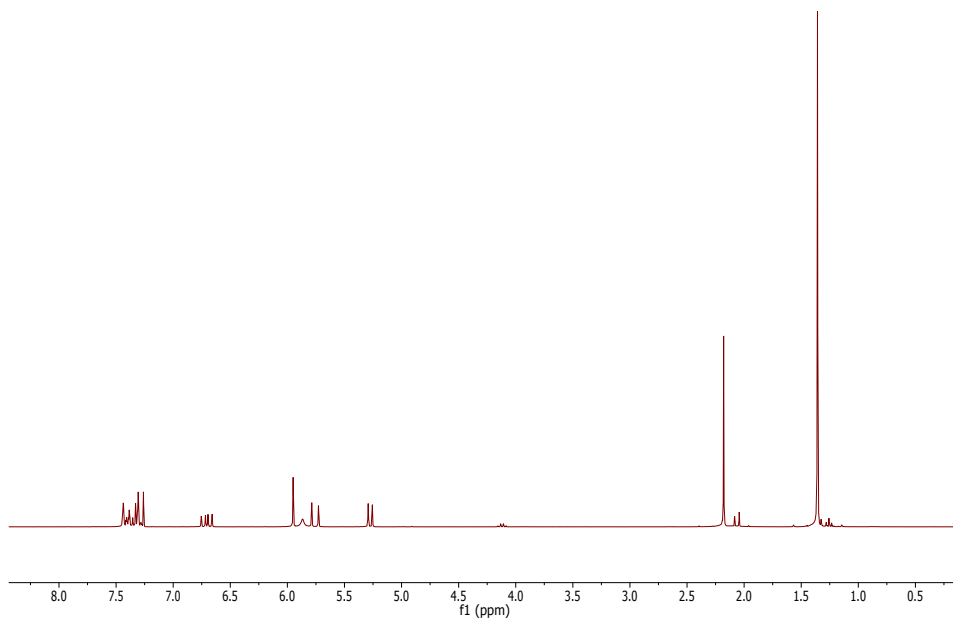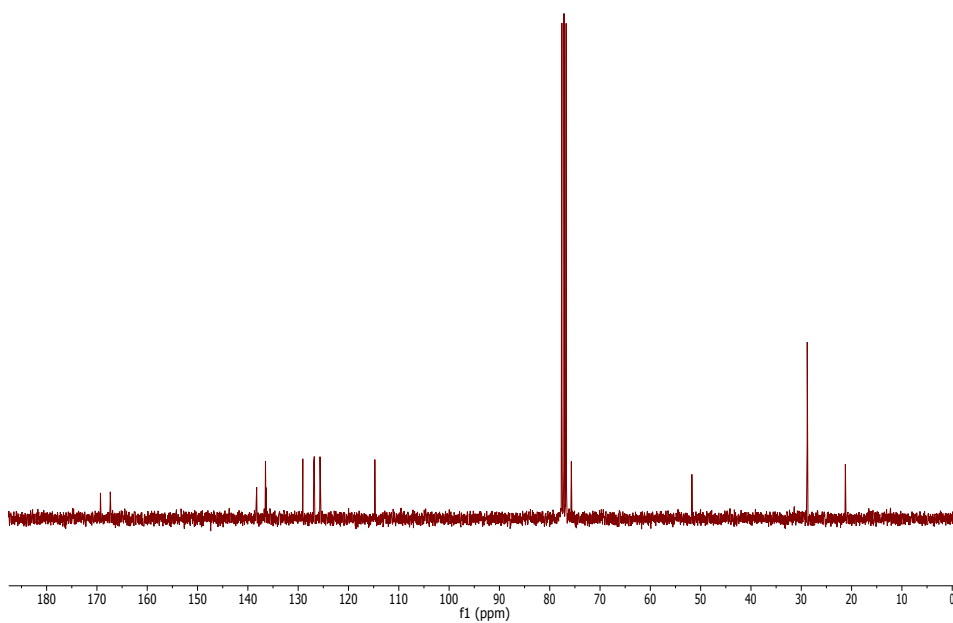

***t*Bu-Pentyne-Sty.**

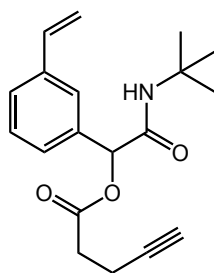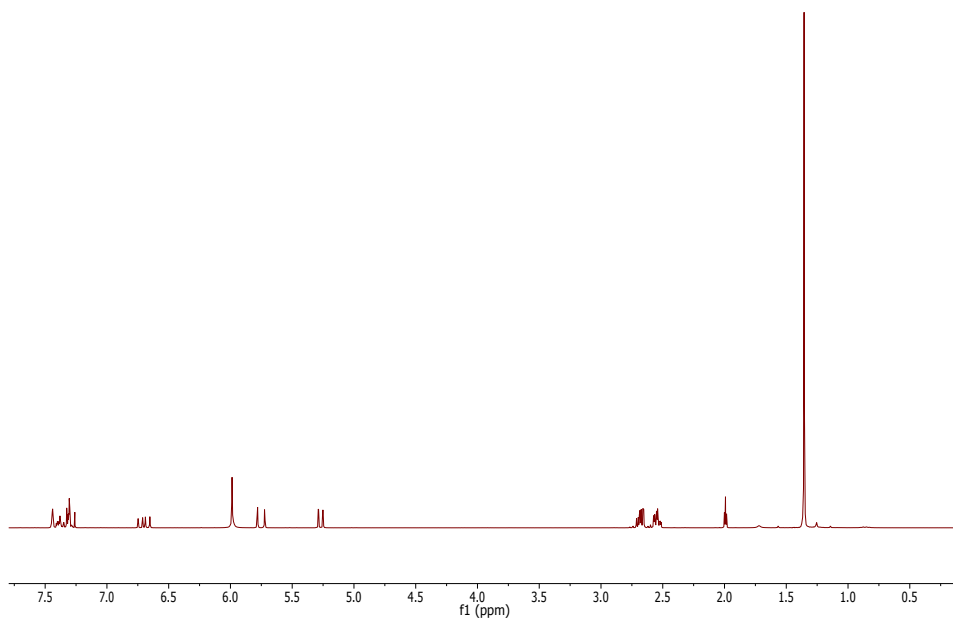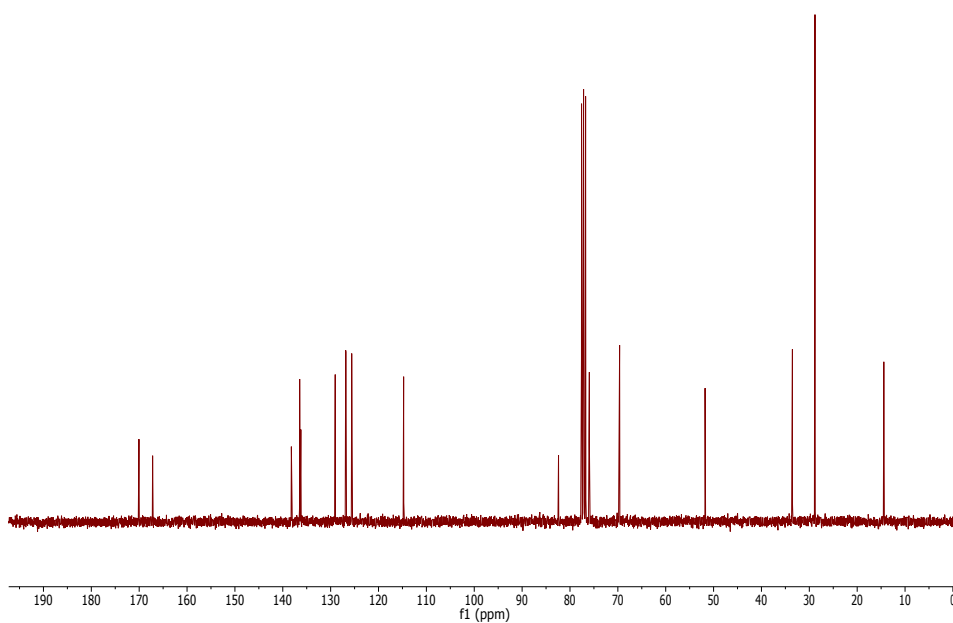

## Polymer Synthesis: more SEC measurements

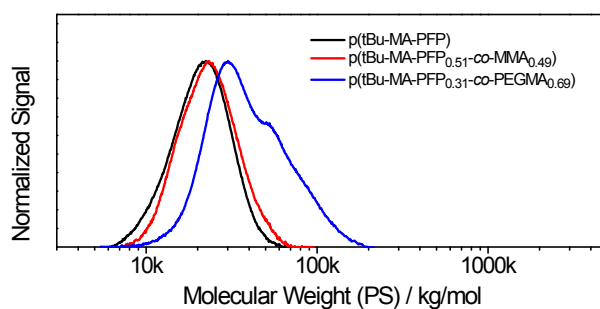

SEC traces of reactive homo- and copolymers

## Chain Extension Experiments

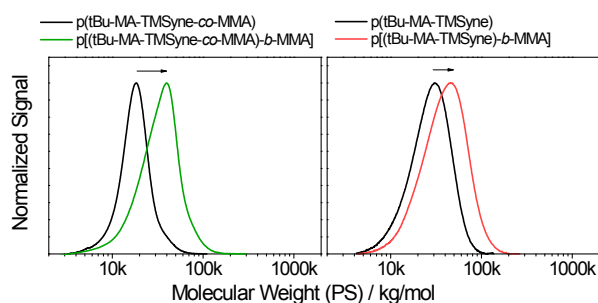

SEC traces of reactive homo- (right) and copolymer (left) and after chain extension with a block of methyl methacrylate

## Summary of Polymer Solubility

| Polymer                                                                                  | H <sub>2</sub> O | MeOH | EtOH | MeCN | DMSO | DMF | DMAc | THF | EtOAc | CHCl <sub>3</sub> | PhOMe | Et <sub>2</sub> O | Hex |
|------------------------------------------------------------------------------------------|------------------|------|------|------|------|-----|------|-----|-------|-------------------|-------|-------------------|-----|
| p( <i>t</i> Bu-MA-PFP <sub>0.51</sub> - <i>co</i> -MMA <sub>0.49</sub> )                 | i                | s    | s    | s    | s    | s   | s    | s   | s     | s                 | s     | i                 | i   |
| p( <i>t</i> Bu-Ac-Sty)                                                                   | i                | s    | s    | s    | s    | s   | s    | s   | s     | s                 | s     | i                 | i   |
| p( <i>t</i> Bu-Ac-Sty <sub>0.56</sub> - <i>co</i> -Sty <sub>0.44</sub> )                 | i                | s    | s    | s    | s    | s   | s    | s   | s     | s                 | s     | i                 | i   |
| p( <i>t</i> Bu-MA-Fur)                                                                   | i                | s    | –    | s    | s    | s   | s    | –   | –     | s                 | s     | i                 | i   |
| p( <i>t</i> Bu-MA-TMSyne)                                                                | i                | s    | s    | s    | s    | s   | s    | s   | s     | s                 | s     | i                 | i   |
| p( <i>t</i> Bu-MA-PFP)                                                                   | i                | –    | s    | s    | s    | s   | s    | –   | –     | s                 | s     | i                 | i   |
| p( <i>t</i> Bu-MA-Pentene <sub>0.37</sub> - <i>co</i> -MMA <sub>0.63</sub> )             | i                | s    | s    | s    | s    | s   | s    | s   | s     | s                 | s     | i                 | i   |
| p( <i>t</i> Bu-MA-TMSyne <sub>0.50</sub> - <i>co</i> -MMA <sub>0.50</sub> )              | i                | s    | s    | s    | s    | s   | s    | s   | s     | s                 | s     | i                 | i   |
| p( <i>t</i> Bu-MA-PFP <sub>0.69</sub> - <i>co</i> - <i>t</i> Bu-MA-Fur <sub>0.31</sub> ) | i                | s    | s    | s    | s    | s   | s    | s   | s     | s                 | s     | i                 | i   |
| p(cHex-A-PFP)                                                                            | i                | s    | s    | s    | s    | s   | s    | s   | s     | s                 | s     | i                 | i   |
| p( <i>t</i> Bu-MA-PFP <sub>0.31</sub> - <i>co</i> -PEGMA <sub>0.69</sub> )               | L                | –    | –    | s    | s    | s   | s    | –   | –     | s                 | s     | i                 | i   |
| p( <i>t</i> Bu-MA-Pentene <sub>0.34</sub> - <i>co</i> -PEGMA <sub>0.66</sub> )           | L                | –    | –    | s    | s    | s   | s    | –   | –     | s                 | s     | i                 | i   |

s = soluble

i = insoluble

– = not determined

L = lower critical solution temperature behaviour
